# Supplementary material
Source: PubMed Central journal article supplement (PMC3372199)

1 **Supplemental Figure 1**

2 Multiple sequence alignment of HA amino acid residues 59-252 (globular head domain) of  
3 all 84 naturally-occurring, non-redundant human H2N2 strains in the Influenza Research  
4 Database in the order of the phylogram (Supplemental Figure 2). Residues that belong to  
5 the RBD are highlighted in red in the A/Japan/305/1957 (CY014976) sequence at the top.  
6 Residues identical to those of this Japan/305 strain are denoted by solid color, green for  
7 early H2 strains and blue for late H2 strains. Mutated residues are highlighted in white (or  
8 grey for conservative mutations). Residues that have been identified as contact residues of  
9 the human H2 mAbs 8F8, 8M2, or 2G1 are annotated with the mAb name in grey at the top.

10



|                                       | 116A |   | 120 | 123 |   | 130 | 8M2 8F8 | 135 | 140 | 145 | 150 | 155 | 2G1 | 160 | 165 | 170 |   |   |
|---------------------------------------|------|---|-----|-----|---|-----|---------|-----|-----|-----|-----|-----|-----|-----|-----|-----|---|---|
|                                       | B    | C |     |     |   |     |         |     |     |     |     |     |     |     |     |     |   |   |
| A/Japan/305/1957 (CY014976)           | H    | F | E   | K   | V | K   | I       | L   | P   | K   | D   | R   | W   | T   | Q   | H   | T | T |
| A/Japan/305/1957 (AY209953)           | H    | F | E   | K   | V | K   | I       | L   | P   | K   | D   | R   | W   | T   | Q   | H   | T | T |
| A/Japan/305/1957 (CY044325)           | H    | F | E   | K   | V | K   | I       | L   | P   | K   | D   | R   | W   | T   | Q   | H   | T | T |
| A/Japan/305/1957 (DQ508841)           | H    | F | E   | K   | V | K   | I       | L   | P   | K   | D   | R   | W   | T   | Q   | H   | T | T |
| A/El Salvador/2/1957 (AF270716)       | H    | F | E   | K   | V | K   | I       | L   | P   | K   | D   | R   | W   | T   | Q   | H   | T | T |
| A/Japan/305 MA12/1957 (CY087800)      | H    | F | E   | K   | V | K   | I       | L   | P   | K   | D   | R   | W   | T   | Q   | H   | T | T |
| A/Albany/7/1957 (AF270720)            | H    | F | E   | K   | V | K   | I       | L   | P   | K   | D   | R   | W   | T   | Q   | H   | T | T |
| A/Chile/13/1957 (AY209952)            | H    | F | E   | K   | V | K   | I       | L   | P   | K   | D   | R   | W   | T   | Q   | H   | T | T |
| A/El Salvador/2/1957 (HM204767)       | H    | F | E   | K   | V | K   | I       | L   | P   | K   | D   | R   | W   | T   | Q   | H   | T | T |
| A/Krasnodar/101/1959 (CY032253)       | H    | F | E   | K   | V | K   | I       | L   | P   | K   | D   | R   | W   | T   | Q   | H   | T | T |
| A/RI/5/1957 (AF270718)                | H    | F | E   | K   | V | K   | I       | L   | P   | K   | D   | R   | W   | T   | Q   | H   | T | T |
| A/Albany/2/1958 (CY020317)            | H    | F | E   | K   | V | K   | I       | L   | P   | K   | D   | R   | W   | T   | Q   | H   | T | T |
| A/Albany/22/1957 (CY021805)           | H    | F | E   | K   | V | K   | I       | L   | P   | K   | D   | R   | W   | T   | Q   | H   | T | T |
| A/El Salvador/2 Q226L/1957 (HM204775) | H    | F | E   | K   | V | K   | I       | L   | P   | K   | D   | R   | W   | T   | Q   | H   | T | T |
| A/Albany/26/1957 (CY020381)           | H    | F | E   | K   | V | K   | I       | L   | P   | K   | D   | R   | W   | T   | Q   | H   | T | T |
| A/Albany/3/1958 (CY021069)            | H    | F | E   | K   | V | K   | I       | L   | P   | K   | D   | R   | W   | T   | Q   | H   | T | T |
| A/Albany/4/1958 (CY020373)            | H    | F | E   | K   | V | K   | I       | L   | P   | K   | D   | R   | W   | T   | Q   | H   | T | T |
| A/Albany/1/1958 (CY021813)            | H    | F | E   | K   | V | K   | I       | L   | P   | K   | D   | R   | W   | T   | Q   | H   | T | T |
| A/Albany/6/1958 (AF270723)            | H    | F | E   | K   | V | K   | I       | L   | P   | K   | D   | R   | W   | T   | Q   | H   | T | T |
| A/Guiyang/1/1957 (CY032269)           | H    | F | E   | K   | V | K   | I       | L   | P   | K   | D   | R   | W   | T   | Q   | H   | T | T |
| A/RI/5+/1957 (AF270722)               | H    | F | E   | K   | V | K   | I       | L   | P   | K   | D   | R   | W   | T   | Q   | H   | T | T |
| A/Albany/20/1957 (CY022013)           | H    | F | E   | K   | V | K   | I       | L   | P   | K   | D   | R   | W   | T   | Q   | H   | T | T |
| A/Sao Paolo/3/1959 (AF270725)         | H    | F | E   | K   | V | K   | I       | L   | P   | K   | D   | R   | W   | T   | Q   | H   | T | T |
| A/Albany/1/1959 (CY020541)            | H    | F | E   | K   | V | K   | I       | L   | P   | K   | D   | R   | W   | T   | Q   | H   | T | T |
| A/Sao Paolo/1/1961 (AY209957)         | H    | F | E   | K   | V | K   | I       | L   | P   | K   | D   | R   | W   | T   | Q   | H   | T | T |
| A/Albany/1/1960 (CY021933)            | H    | F | E   | K   | V | K   | I       | L   | P   | K   | D   | R   | W   | T   | Q   | H   | T | T |
| A/Ohio/2/1959 (AF270727)              | H    | F | E   | K   | V | K   | I       | L   | P   | K   | D   | R   | W   | T   | Q   | H   | T | T |
| A/Philippines/2/1960 (AY209954)       | H    | F | E   | K   | V | K   | I       | L   | P   | K   | D   | R   | W   | T   | Q   | H   | T | T |
| A/Victoria/15681/1959 (AF270726)      | H    | F | E   | K   | V | K   | I       | L   | P   | K   | D   | R   | W   | T   | Q   | H   | T | T |
| A/Kayano/1957 (AB056699)              | H    | F | E   | K   | V | K   | I       | L   | P   | K   | D   | R   | W   | T   | Q   | H   | T | T |
| A/Adachi/2/1957 (AB432937)            | H    | F | E   | K   | V | K   | I       | L   | P   | K   | D   | R   | W   | T   | Q   | H   | T | T |
| A/Ann Arbor/6/1960 (AF270721)         | H    | F | E   | K   | V | K   | I       | L   | P   | K   | D   | R   | W   | T   | Q   | H   | T | T |
| A/Malaya/16/1958 (AF270724)           | H    | F | E   | K   | V | K   | I       | L   | P   | K   | D   | R   | W   | T   | Q   | H   | T | T |
| A/Moscow/1019/1965 (CY031603)         | H    | F | E   | K   | V | K   | I       | L   | P   | K   | D   | R   | W   | T   | Q   | H   | T | T |
| A/Ann Arbor/23/1957 (CY031579)        | H    | F | E   | K   | V | K   | I       | L   | P   | K   | D   | R   | W   | T   | Q   | H   | T | T |
| A/Netherlands/001M/1958 (CY077741)    | H    | F | E   | K   | V | K   | I       | L   | P   | K   | D   | R   | W   | T   | Q   | H   | T | T |
| A/Yale/1/1961 (AY209958)              | H    | F | E   | K   | V | K   | I       | L   | P   | K   | D   | R   | W   | T   | Q   | H   | T | T |
| A/Netherlands/056H1/1960 (CY077786)   | H    | F | E   | K   | V | K   | I       | L   | P   | K   | D   | R   | W   | T   | Q   | H   | T | T |
| A/England/1/1961 (AY209955)           | H    | F | E   | K   | V | K   | I       | L   | P   | K   | D   | R   | W   | T   | Q   | H   | T | T |
| A/Netherlands/60/1962 (AY209960)      | H    | F | E   | K   | V | K   | I       | L   | P   | K   | D   | R   | W   | T   | Q   | H   | T | T |
| A/Japan/170/1962 (AY209959)           | H    | F | E   | K   | V | K   | I       | L   | P   | K   | D   | R   | W   | T   | Q   | H   | T | T |
| A/Tokyo/3/1967 (AY209987)             | H    | F | E   | K   | V | K   | I       | L   | P   | K   | D   | R   | W   | T   | Q   | H   | T | T |
| A/Taiwan/1/1962 (AY209961)            | H    | F | E   | K   | V | K   | I       | L   | P   | K   | D   | R   | W   | T   | Q   | H   | T | T |
| A/Albany/1/1965 (AY209970)            | H    | F | E   | K   | V | K   | I       | L   | P   | K   | D   | R   | W   | T   | Q   | H   | T | T |
| A/Berlin/3/1964 (CY032237)            | H    | F | E   | K   | V | K   | I       | L   | P   | K   | D   | R   | W   | T   | Q   | H   | T | T |
| A/Potsdam/2/1965 (CY032245)           | H    | F | E   | K   | V | K   | I       | L   | P   | K   | D   | R   | W   | T   | Q   | H   | T | T |
| A/Albany/6/1967 (CY020389)            | H    | F | E   | K   | V | K   | I       | L   | P   | K   | D   | R   | W   | T   | Q   | H   | T | T |
| A/Albany/3/1967 (CY020405)            | H    | F | E   | K   | V | K   | I       | L   | P   | K   | D   | R   | W   | T   | Q   | H   | T | T |
| A/Albany/4/1967 (CY021997)            | H    | F | E   | K   | V | K   | I       | L   | P   | K   | D   | R   | W   | T   | Q   | H   | T | T |
| A/Albany/9/1967 (CY020517)            | H    | F | E   | K   | V | K   | I       | L   | P   | K   | D   | R   | W   | T   | Q   | H   | T | T |
| A/Ann Arbor/7/1967 (AY209978)         | H    | F | E   | K   | V | K   | I       | L   | P   | K   | D   | R   | W   | T   | Q   | H   | T | T |
| A/Berkeley/1/1968 (CY033473)          | H    | F | E   | K   | V | K   | I       | L   | P   | K   | D   | R   | W   | T   | Q   | H   | T | T |
| A/Albany/1/1968 (CY021021)            | H    | F | E   | K   | V | K   | I       | L   | P   | K   | D   | R   | W   | T   | Q   | H   | T | T |
| A/Panama/1/1967 (AY209983)            | H    | F | E   | K   | V | K   | I       | L   | P   | K   | D   | R   | W   | T   | Q   | H   | T | T |
| A/Cottbus/1/1964 (CY032261)           | H    | F | E   | K   | V | K   | I       | L   | P   | K   | D   | R   | W   | T   | Q   | H   | T | T |
| A/Pittsburgh/2/1965 (AY209973)        | H    | F | E   | K   | V | K   | I       | L   | P   | K   | D   | R   | W   | T   | Q   | H   | T | T |
| A/Kumamoto/1/1965 (AY209971)          | H    | F | E   | K   | V | K   | I       | L   | P   | K   | D   | R   | W   | T   | Q   | H   | T | T |
| A/Izumi/5/1965 (D13579)               | H    | F | E   | K   | V | K   | I       | L   | P   | K   | D   | R   | W   | T   | Q   | H   | T | T |
| A/Canada/1/1966 (AY209976)            | H    | F | E   | K   | V | K   | I       | L   | P   | K   | D   | R   | W   | T   | Q   | H   | T | T |
| A/Tashkent/1046/1967 (CY032277)       | H    | F | E   | K   | V | K   | I       | L   | P   | K   | D   | R   | W   | T   | Q   | H   | T | T |
| A/Berkeley/1/1966 (AY209974)          | H    | F | E   | K   | V | K   | I       | L   | P   | K   | D   | R   | W   | T   | Q   | H   | T | T |
| A/Cordoba/522/1967 (AY209979)         | H    | F | E   | K   | V | K   | I       | L   | P   | K   | D   | R   | W   | T   | Q   | H   | T | T |
| A/Montevideo/2208/1967 (AY209986)     | H    | F | E   | K   | V | K   | I       | L   | P   | K   | D   | R   | W   | T   | Q   | H   | T | T |
| A/Georgia/1/1967 (CY033980)           | H    | F | E   | K   | V | K   | I       | L   | P   | K   | D   | R   | W   | T   | Q   | H   | T | T |
| A/Georgia/1/1967 (AY209981)           | H    | F | E   | K   | V | K   | I       | L   | P   | K   | D   | R   | W   | T   | Q   | H   | T | T |
| A/Johannesburg/567/1967 (AY209982)    | H    | F | E   | K   | V | K   | I       | L   | P   | K   | D   | R   | W   | T   | Q   | H   | T | T |
| A/Johannesburg/617/1967 (CY032285)    | H    | F | E   | K   | V | K   | I       | L   | P   | K   | D   | R   | W   | T   | Q   | H   | T | T |
| A/Panama/1/1966 (AY209977)            | H    | F | E   | K   | V | K   | I       | L   | P   | K   | D   | R   | W   | T   | Q   | H   | T | T |
| A/California/1/1966 (AY209975)        | H    | F | E   | K   | V | K   | I       | L   | P   | K   | D   | R   | W   | T   | Q   | H   | T | T |
| A/Poland/5/1967 (AY209984)            | H    | F | E   | K   | V | K   | I       | L   | P   | K   | D   | R   | W   | T   | Q   | H   | T | T |
| A/England/10/1967 (AY209980)          | H    | F | E   | K   | V | K   | I       | L   | P   | K   | D   | R   | W   | T   | Q   | H   | T | T |
| A/Taiwan/1/1967 (AY209985)            | H    | F | E   | K   | V | K   | I       | L   | P   | K   | D   | R   | W   | T   | Q   | H   | T | T |
| A/England/12/1964 (AY209967)          | H    | F | E   | K   | V | K   | I       | L   | P   | K   | D   | R   | W   | T   | Q   | H   | T | T |
| A/Murakami/4/1964 (AY209968)          | H    | F | E   | K   | V | K   | I       | L   | P   | K   | D   | R   | W   | T   | Q   | H   | T | T |
| A/New Jersey/3/1965 (AY209972)        | H    | F | E   | K   | V | K   | I       | L   | P   | K   | D   | R   | W   | T   | Q   | H   | T | T |
| A/Korea/426/1968 (CY031595)           | H    | F | E   | K   | V | K   | I       | L   | P   | K   | D   | R   | W   | T   | Q   | H   | T | T |
| A/Taiwan/1/1964 (AY209969)            | H    | F | E   | K   | V | K   | I       | L   | P   | K   | D   | R   | W   | T   | Q   | H   | T | T |
| A/Netherlands/56/1963 (CY035078)      | H    | F | E   | K   | V | K   | I       | L   | P   | K   | D   | R   | W   | T   | Q   | H   | T | T |
| A/Netherlands/65/1963 (AY209966)      | H    | F | E   | K   | V | K   | I       | L   | P   | K   | D   | R   | W   | T   | Q   | H   | T | T |
| A/Georgia/1/1963 (AY209964)           | H    | F | E   | K   | V | K   | I       | L   | P   | K   | D   | R   | W   | T   | Q   | H   | T | T |
| A/Netherlands/001K1/1963 (CY077733)   | H    | F | E   | K   | V | K   | I       | L   | P   | K   | D   | R   | W   | T   | Q   | H   | T | T |
| A/North Carolina/1/1968 (CY031587)    | H    | F | E   | K   | V | K   | I       | L   | P   | K   | D   | R   | W   | T   | Q   | H   | T | T |
| A/Albany/1/1963 (AY209963)            | H    | F | E   | K   | V | K   | I       | L   | P   | K   | D   | R   | W   | T   | Q   | H   | T | T |
| A/Great Lakes/3/1963 (AY209965)       | H    | F | E   | K   | V | K   | I       | L   | P   | K   | D   | R   | W   | T   | Q   | H   | T | T |



|                                       | 235 | 240 | 245 | 250 |
|---------------------------------------|-----|-----|-----|-----|
| A/Japan/305/1957 (CY014976)           | T   | L   | L   | D   |
| A/Japan/305/1957 (AY209953)           | T   | L   | L   | D   |
| A/Japan/305/1957 (CY044325)           | T   | L   | L   | D   |
| A/Japan/305/1957 (DQ508841)           | T   | L   | L   | D   |
| A/El Salvador/2/1957 (AF270716)       | T   | L   | L   | D   |
| A/Japan/305 MA12/1957 (CY087800)      | T   | L   | L   | D   |
| A/Albany/7/1957 (AF270720)            | T   | L   | L   | D   |
| A/Chile/13/1957 (AY209952)            | T   | L   | L   | D   |
| A/El Salvador/2/1957 (HM204767)       | T   | L   | L   | D   |
| A/Krasnodar/101/1959 (CY032253)       | T   | L   | L   | D   |
| A/RI/5/1957 (AF270718)                | T   | L   | L   | D   |
| A/Albany/2/1958 (CY020317)            | T   | L   | L   | D   |
| A/Albany/22/1957 (CY021805)           | T   | L   | L   | D   |
| A/El Salvador/2 Q226L/1957 (HM204775) | T   | L   | L   | D   |
| A/Albany/26/1957 (CY020381)           | T   | L   | L   | D   |
| A/Albany/3/1958 (CY021069)            | T   | L   | L   | D   |
| A/Albany/4/1958 (CY020373)            | T   | L   | L   | D   |
| A/Albany/1/1958 (CY021813)            | T   | L   | L   | D   |
| A/Albany/6/1958 (AF270723)            | T   | L   | L   | D   |
| A/Guiyang/1/1957 (CY032269)           | T   | L   | L   | D   |
| A/RI/5+/1957 (AF270722)               | T   | L   | L   | D   |
| A/Albany/20/1957 (CY022013)           | T   | L   | L   | D   |
| A/Sao Paolo/3/1959 (AF270725)         | T   | L   | L   | D   |
| A/Albany/1/1959 (CY020541)            | T   | L   | L   | D   |
| A/Sao Paolo/1/1961 (AY209957)         | T   | L   | L   | D   |
| A/Albany/1/1960 (CY021933)            | T   | L   | L   | D   |
| A/Ohio/2/1959 (AF270727)              | T   | L   | L   | D   |
| A/Philippines/2/1960 (AY209954)       | T   | L   | L   | D   |
| A/Victoria/15681/1959 (AF270726)      | T   | L   | L   | D   |
| A/Kayano/1957 (AB056699)              | T   | L   | L   | D   |
| A/Adachi/2/1957 (AB432937)            | T   | L   | L   | D   |
| A/Ann Arbor/6/1960 (AF270721)         | T   | L   | L   | D   |
| A/Malaya/16/1958 (AF270724)           | T   | L   | L   | D   |
| A/Moscow/1019/1965 (CY031603)         | T   | L   | L   | D   |
| A/Ann Arbor/23/1957 (CY031579)        | T   | L   | L   | D   |
| A/Netherlands/001M/1958 (CY077741)    | T   | L   | L   | D   |
| A/Yale/1/1961 (AY209958)              | T   | L   | L   | D   |
| A/Netherlands/056H1/1960 (CY077786)   | T   | L   | L   | D   |
| A/England/1/1961 (AY209955)           | T   | L   | L   | D   |
| A/Netherlands/60/1962 (AY209960)      | T   | L   | L   | D   |
| A/Japan/170/1962 (AY209959)           | T   | L   | L   | D   |
| A/Tokyo/3/1967 (AY209987)             | T   | L   | L   | D   |
| A/Taiwan/1/1962 (AY209961)            | T   | L   | L   | D   |
| A/Albany/1/1965 (AY209970)            | T   | L   | L   | D   |
| A/Berlin/3/1964 (CY032237)            | T   | L   | L   | D   |
| A/Potsdam/2/1965 (CY032245)           | T   | L   | L   | D   |
| A/Albany/6/1967 (CY020389)            | T   | L   | L   | D   |
| A/Albany/3/1967 (CY020405)            | T   | L   | L   | D   |
| A/Albany/4/1967 (CY021997)            | T   | L   | L   | D   |
| A/Albany/9/1967 (CY020517)            | T   | L   | L   | D   |
| A/Ann Arbor/7/1967 (AY209978)         | T   | L   | L   | D   |
| A/Berkeley/1/1968 (CY033473)          | T   | L   | L   | D   |
| A/Albany/1/1968 (CY021021)            | T   | L   | L   | D   |
| A/Panama/1/1967 (AY209983)            | T   | L   | L   | D   |
| A/Cottbus/1/1964 (CY032261)           | T   | L   | L   | D   |
| A/Pittsburgh/2/1965 (AY209973)        | T   | L   | L   | D   |
| A/Kumamoto/1/1965 (AY209971)          | T   | L   | L   | D   |
| A/Izumi/5/1965 (D13579)               | T   | L   | L   | D   |
| A/Canada/1/1966 (AY209976)            | T   | L   | L   | D   |
| A/Tashkent/1046/1967 (CY032277)       | T   | L   | L   | D   |
| A/Berkeley/1/1966 (AY209974)          | T   | L   | L   | D   |
| A/Cordoba/522/1967 (AY209979)         | T   | L   | L   | D   |
| A/Montevideo/2208/1967 (AY209986)     | T   | L   | L   | D   |
| A/Georgia/1/1967 (CY033980)           | T   | L   | L   | D   |
| A/Georgia/1/1967 (AY209981)           | T   | L   | L   | D   |
| A/Johannesburg/567/1967 (AY209982)    | T   | L   | L   | D   |
| A/Johannesburg/617/1967 (CY032285)    | T   | L   | L   | D   |
| A/Panama/1/1966 (AY209977)            | T   | L   | L   | D   |
| A/California/1/1966 (AY209975)        | T   | L   | L   | D   |
| A/Poland/5/1967 (AY209984)            | T   | L   | L   | D   |
| A/England/10/1967 (AY209980)          | T   | L   | L   | D   |
| A/Taiwan/1/1967 (AY209985)            | T   | L   | L   | D   |
| A/England/12/1964 (AY209967)          | T   | L   | L   | D   |
| A/Murakami/4/1964 (AY209968)          | T   | L   | L   | D   |
| A/New Jersey/3/1965 (AY209972)        | T   | L   | L   | D   |
| A/Korea/426/1968 (CY031595)           | T   | L   | L   | D   |
| A/Taiwan/1/1964 (AY209969)            | T   | L   | L   | D   |
| A/Netherlands/56/1963 (CY035078)      | T   | L   | L   | D   |
| A/Netherlands/65/1963 (AY209966)      | T   | L   | L   | D   |
| A/Georgia/1/1963 (AY209964)           | T   | L   | L   | D   |
| A/Netherlands/001K1/1963 (CY077733)   | T   | L   | L   | D   |
| A/North Carolina/1/1968 (CY031587)    | T   | L   | L   | D   |
| A/Albany/1/1963 (AY209963)            | T   | L   | L   | D   |
| A/Great Lakes/3/1963 (AY209965)       | T   | L   | L   | D   |

18 **Supplemental Figure 2**

19 Phylogram of all 84 naturally-occurring, non-redundant human H2N2 HA sequences in the  
20 Influenza Research Database based on the protein sequences of residues 59-252 (globular  
21 head domain) of the HA1 subunit (MacVector 12.0.1). The phylogram branches are colored  
22 green for early H2 strains and blue for late H2 strains.

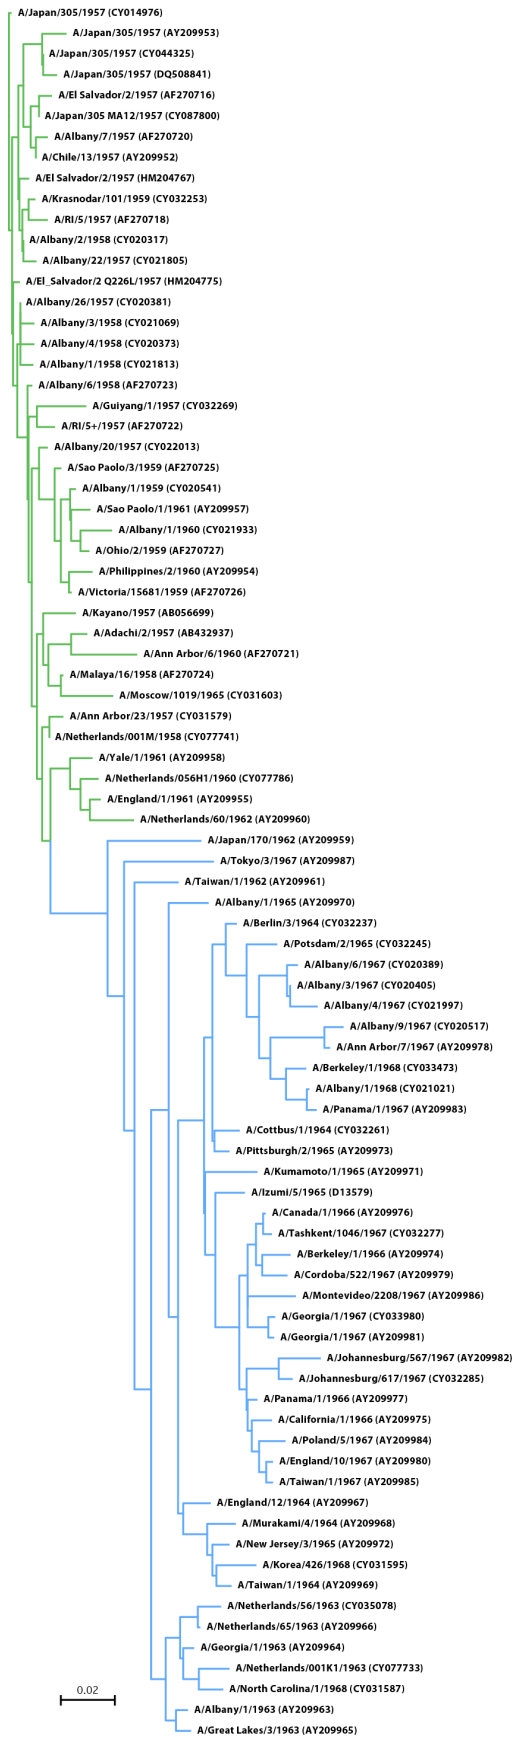

Supplement: supp_86.11.6334_FigS1-S2.pdf [file supp_86.11.6334_FigS1-S2.pdf]
